# Supplementary material
Source: PubMed Central journal article supplement (PMC2290341)

**A1 EGFP SCWM**

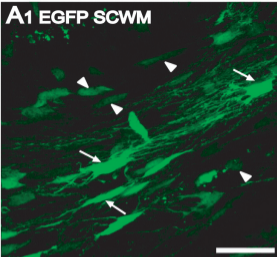

**A2 MBP SCWM**

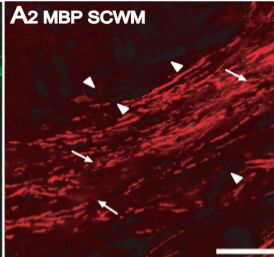

**A3 merge SCWM**

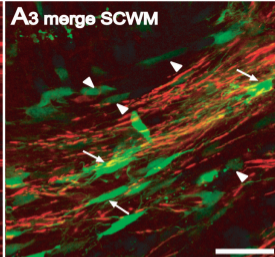

**B1 EGFP SCWM**

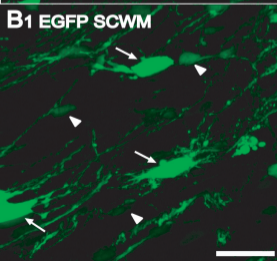

**B2 CNP(protein) SCWM**

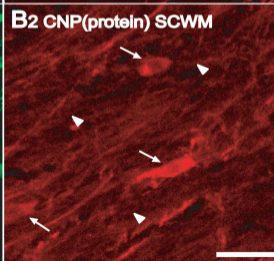

**B3 merge SCWM**

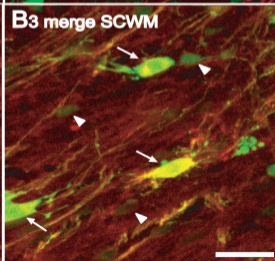

Supplement: tjp0541-0545-fs1.pdf [file tjp0541-0545-fs1.pdf]
